# Supplementary material for: A Chemometric Approach to Oxidative Stability and Physicochemical Quality of Raw Ground Chicken Meat Affected by Black Seed and Other Spice Extracts
Source: PubMed Central journal article supplement (PMC7555872; doi:10.3390/antiox9090903), 2020-09-22
Supplement: antioxidants-09-00903-s001.pdf [file antioxidants-09-00903-s001.pdf]

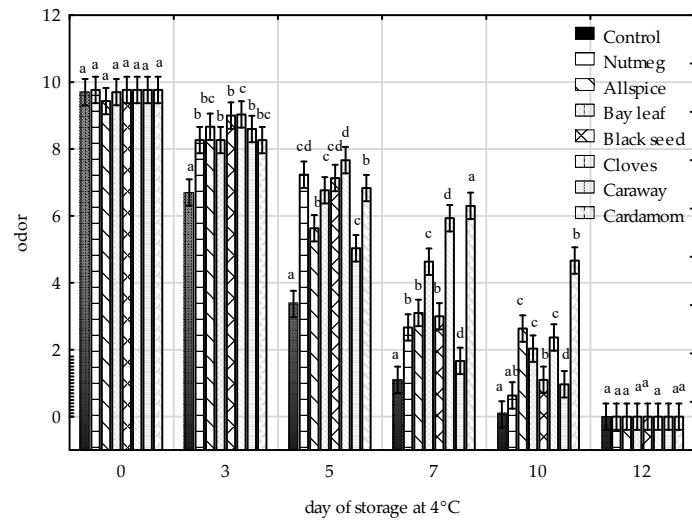

(a)

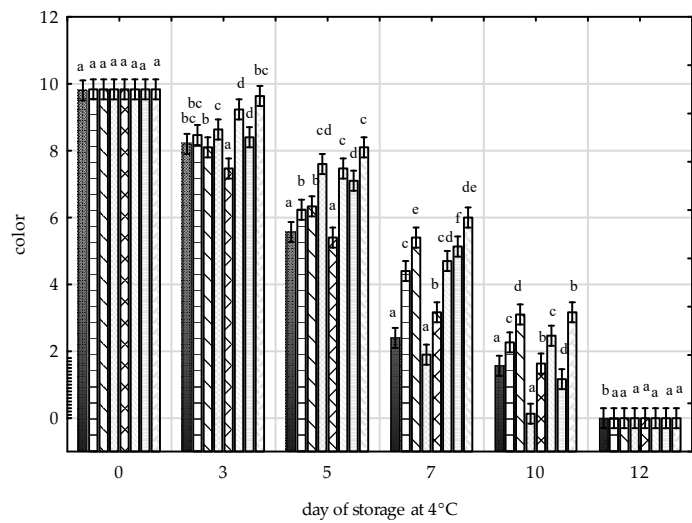

(b)

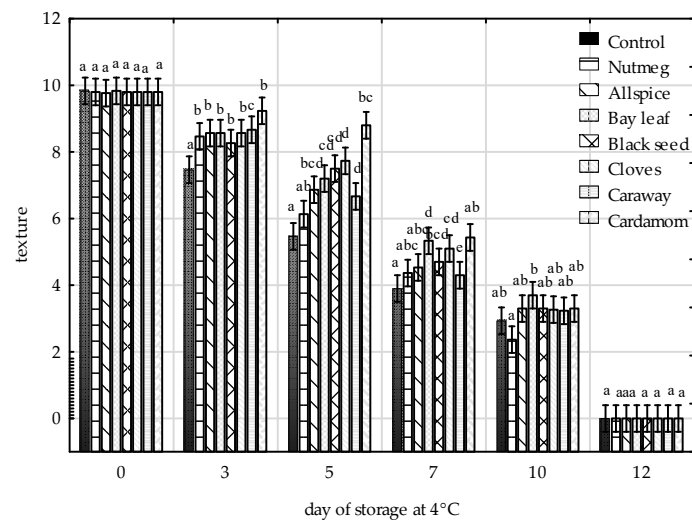

(c)

**Figure S1.** Effects of time and treatments on sensory attributes: (a) odor, (b) color, (c) texture of raw ground chicken meat stored at 4°C during 12 days. Columns present total mean values; vertical bars denote 0.95 confidence intervals, and means with the same superscript are not different ( $p > 0.05$ , Duncan's test).

**Table S1.** r Pearson's correlation coefficients between parameters of lipid and protein oxidation (TBARS – thiobarbituric acid reagent substances, CD – conjugated diene content, SH – thiol group content, hexanal content), and color coordinates (L\*a\*b\*). \* statistically significant coefficient ( $p \leq 0.05$ , Student's t test).

|                   | TBARS  | hexanal | CD<br>content | SH<br>content | L*(D65) | a*(D65) | b*(D65) |
|-------------------|--------|---------|---------------|---------------|---------|---------|---------|
| <b>TBARS</b>      | 1.00   |         |               |               |         |         |         |
| <b>hexanal</b>    | 0.54*  | 1.00    |               |               |         |         |         |
| <b>CD content</b> | 0.46*  | 0.17*   | 1.00          |               |         |         |         |
| <b>SH content</b> | -0.70* | -0.49*  | -0.53*        | 1.00          |         |         |         |
| <b>L*(D65)</b>    | 0.52*  | 0.55*   | -0.02         | -0.67*        | 1.00    |         |         |
| <b>a*(D65)</b>    | -0.15  | 0.04    | 0.19*         | 0.17*         | -0.07   | 1.00    |         |
| <b>b*(D65)</b>    | 0.06   | 0.12    | 0.19*         | -0.05         | 0.03    | 0.48*   | 1.00    |

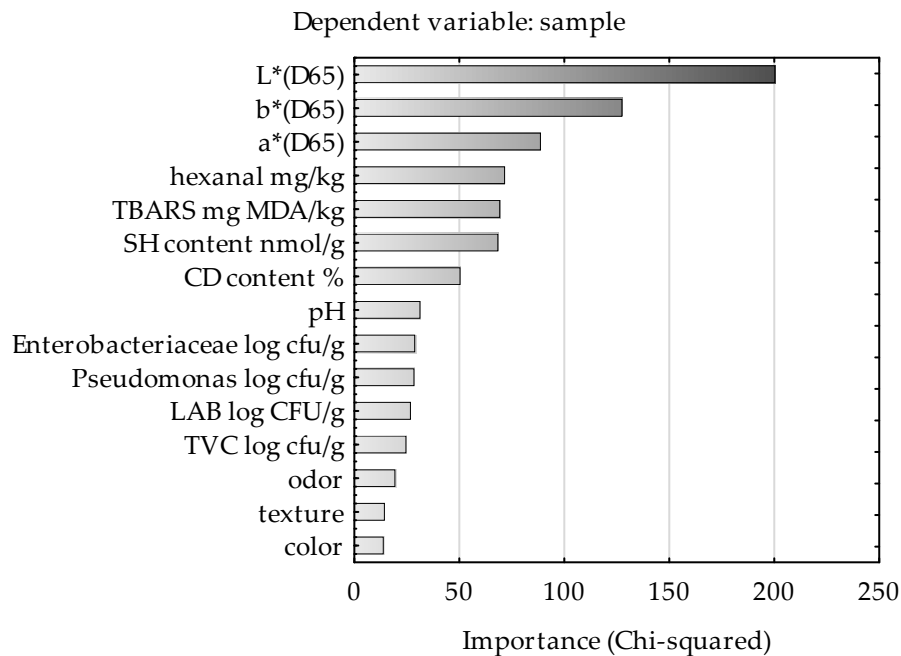

**Figure S2.** Importance (expressed as Chi-squared value) of the predictive variables (TBARS – thiobarbituric acid reagent substances, CD – conjugated diene content, SH – thiol group content, hexanal content, pH, color coordinates: L\*a\*b\*, TVC – total viable count, *Pseudomonas*, *Enterobacteriaceae* and LAB – lactic acid bacteria, odor, color, texture) on the dependent variable: sample.
